# Supplementary material
Source: PubMed Central journal article supplement (PMC10068861)
Supplement: EIJ-D-22-00642_Durand_SD.pdf [file EIJ-D-22-00642_Durand_SD.pdf]

Supplementary data

Supplementary Table 1. Analysis by centre experience level.

| Variables                                                               | Experience centre<br>(N=34) | Early experience<br>centre<br>(N=28) | p-value |
|-------------------------------------------------------------------------|-----------------------------|--------------------------------------|---------|
| <b>Manual conversion</b>                                                |                             |                                      |         |
| Transient                                                               | 0 (0)                       | 2 (4.2)                              | 0.2     |
| Permanent                                                               | 0 (0)                       | 3 (10.7)                             | 0.09    |
| Total                                                                   | 0 (0)                       | 5 (17.8)                             | 0.01    |
| <b>Simulated manual operator radiation exposure, <math>\mu</math>Sv</b> |                             |                                      |         |
| On lead (procedure)                                                     | 8.19 $\pm$ 8.67             | 5.97 $\pm$ 8.70                      | 0.32    |
| Under lead (procedure)                                                  | 0.19 $\pm$ 0.27             | 0.27 $\pm$ 0.77                      | 0.59    |
| <b>Robotic operator radiation exposure, <math>\mu</math>Sv</b>          |                             |                                      |         |
| On lead                                                                 | 50.02 $\pm$ 58.97           | 65.52 $\pm$ 63.69                    | 0.33    |
| Under lead                                                              | 2.95 $\pm$ 4.02             | 3.55 $\pm$ 4.31                      | 0.57    |
| <b>Operator radiation exposure reduction, % (95% CI)</b>                |                             |                                      |         |
| On lead                                                                 | 71.88 (61.91-81.84)         | 83.37 (74.60-92.14)                  | 0.09    |
| Under lead                                                              | 83.90 (75.28-92.51)         | 85.32 (73.89-96.76)                  | 0.84    |
| Robotic contrast volume, mL                                             | 85.01 $\pm$ 34.8            | 91.09 $\pm$ 37.10                    | 0.54    |
| Procedure contrast volume, mL                                           | 129.82 $\pm$ 53.85          | 103.67 $\pm$ 25.56                   | 0.03    |
| Robotic duration, min                                                   | 17.47 $\pm$ 8.02            | 22.23 $\pm$ 10.99                    | 0.07    |
| Procedure duration, min                                                 | 35.50 $\pm$ 11.12           | 45.25 $\pm$ 16.60                    | 0.01    |

Data are mean  $\pm$  SD or n (%). CI (confidence interval), mGy (milligray),  $\mu$ Sv (microsievert), SD (standard deviation)

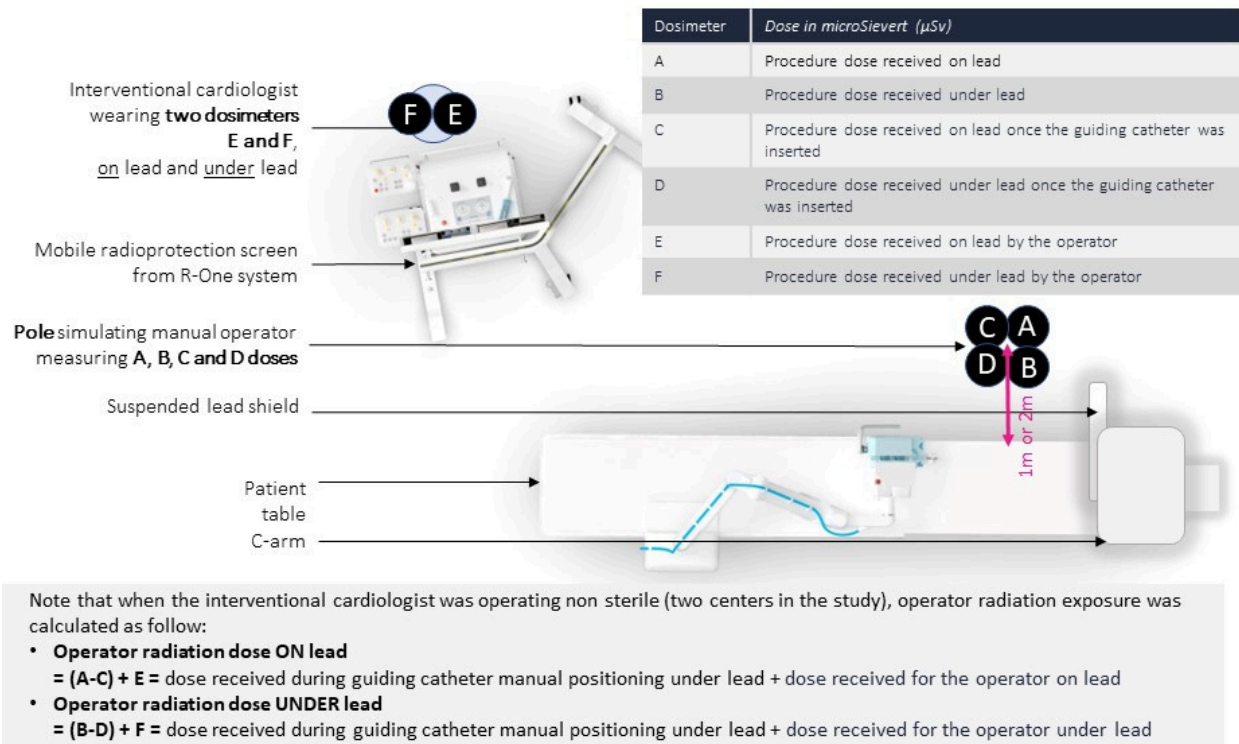

### Supplementary Figure 1. Radiation exposure measurements during robotic PCI.

Dosimeters A-D are located on a pole 1–2 meters from the patient table. Dosimeters E and F are located on the robotic-PCI operator seated behind a radioprotection screen at the control station. Dosimeters A and B measure simulated manual operator radiation exposure on top of and underneath a lead apron, respectively, for the entire duration of the procedure. A piece of lead apron is positioned on top of B to represent the wearing of a lead apron. Dosimeters C and D are identical to A and B except they begin measuring radiation exposure after the initial manual insertion of the guide catheter. Dosimeter readings were multiplied by 4 or 16 depending on the distance from the patient. Dosimeters E and F are worn by the robotic-PCI operator on top of and underneath their lead apron, respectively. Radiation doses are measured in microSieverts ( $\mu\text{Sv}$ ).
